RESEARCH ARTICLE

# Quality Index for Stereoscopic Images by Separately Evaluating Adding and Subtracting

Jiachen Yang<sup>1</sup>, Yancong Lin<sup>1</sup>, Zhiqun Gao<sup>1</sup>, Zhihan Lv<sup>2</sup>, Wei Wei<sup>3</sup>, Houbing Song<sup>4\*</sup>

**1** School of Electronic Information Engineering, Tianjin University, 92 Weijin Road, Tianjin, 300072 China, **2** Shenzhen Institute of Advanced Technology, Chinese Academy of Sciences, 1068 Xueyuan Avenue, Shenzhen University Town, Shenzhen, 518055 China, **3** School of Computer Science and Engineering, Xi'an University of Technology, Xi'an, Shaanxi 710048 China, **4** Department of Electrical and Computer Engineering, West Virginia University, Montgomery, WV 25136 United States of America

\* [Houbing.Song@mail.wvu.edu](mailto:Houbing.Song@mail.wvu.edu)

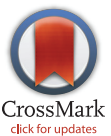

**OPEN ACCESS**

**Citation:** Yang J, Lin Y, Gao Z, Lv Z, Wei W, Song H (2015) Quality Index for Stereoscopic Images by Separately Evaluating Adding and Subtracting. PLoS ONE 10(12): e0145800. doi:10.1371/journal.pone.0145800

**Editor:** Yuanquan Wang, Beijing University of Technology, CHINA

**Received:** June 18, 2015

**Accepted:** December 8, 2015

**Published:** December 30, 2015

**Copyright:** © 2015 Yang et al. This is an open access article distributed under the terms of the [Creative Commons Attribution License](https://creativecommons.org/licenses/by/4.0/), which permits unrestricted use, distribution, and reproduction in any medium, provided the original author and source are credited.

**Data Availability Statement:** All relevant data are within the paper.

**Funding:** This research is partially supported by the National Natural Science Foundation of China (No. 61471260 and No. 61271324), supported by Program for New Century Excellent Talents in University (NCET-12-0400). This work is also supported by the Specialized Research Fund for the Doctoral Program of Higher Education of China (Grant No. 20136118120010) and China Postdoctoral Science Foundation (No. 2013M542370).

## Abstract

The human visual system (HVS) plays an important role in stereo image quality perception. Therefore, it has aroused many people's interest in how to take advantage of the knowledge of the visual perception in image quality assessment models. This paper proposes a full-reference metric for quality assessment of stereoscopic images based on the binocular difference channel and binocular summation channel. For a stereo pair, the binocular summation map and binocular difference map are computed first by adding and subtracting the left image and right image. Then the binocular summation is decoupled into two parts, namely additive impairments and detail losses. The quality of binocular summation is obtained as the adaptive combination of the quality of detail losses and additive impairments. The quality of binocular summation is computed by using the Contrast Sensitivity Function (CSF) and weighted multi-scale (MS-SSIM). Finally, the quality of binocular summation and binocular difference is integrated into an overall quality index. The experimental results indicate that compared with existing metrics, the proposed metric is highly consistent with the subjective quality assessment and is a robust measure. The result have also indirectly proved hypothesis of the existence of binocular summation and binocular difference channels.

## Introduction

In the past several years, we have witnessed a rapid development of stereo and multi-view system and a widespread application of these systems [1–4]. However, various distortions may be introduced during the creation, transmission, processing and display of stereoscopic contents, which will affect the quality perception and result in the visual fatigue and visual discomfort [5, 6]. Consequently, it is important to build an effective tool to measure the quality of stereoscopic images. Stereoscopic image quality assessment (SIQA), which is similar to the two dimensional (2D) quality assessment (2D-IQA), can be categorized into subjective and objective methods [7]. Since

**Competing Interests:** The authors have declared that no competing interests exist.

human eyes are the terminal receiver of visual signals, it is reasonable to regard the subjective assessment, which represents the directional reflection of the HVS, as the most convincing way to evaluate image quality. During the recent year, the research on the subjective experiment has processed steadily, and various factors that may affect the stereoscopic perception have been found and investigated. Zhou offered a standard procedure to evaluate the distortions introduced during the process of transmission and compression [8]. Lee *et al.* proposed a paired comparison based on the subjective experiment which intended to minimize the effect of the subject's limited 3D experience [9]. IJsselsteijn *et al.* investigated how the camera configurations settings impact the visual quality [10]. Wöpking *et al.* figured out the threshold of the binocular disparity and the depth of focus that may cause viewing discomfort [11]. However, the subjective tests based on the specific standard procedure need repeated experiments with a great number of participants [12]. Therefore, the definition of the objective metric, which can be used to reliably predict the perceived quality of stereo images, has drawn great attention of scholars and experts.

However, designing an accurate objective metric is not an easy matter. There are many challenges. Firstly, during the procedure of image processing, various distortions are introduced, if not impossible. It is hard to design a metric that is effective for every type of distortion. Secondly, since the visual signals have various contents, it will lead to sophisticated distortion masking. Lastly, after entering the eyes, the visual signals are decoupled and interpreted by the HVS. However, the HVS and its mathematical modeling have not been realized due to the great complexity. Nevertheless, the research on SIQA has aroused many experts' efforts to make it a reality.

The 2D-IQA has been widely researched and there are many quality assessment metrics such as structural similarity (SSIM) [13], peak signal-to-noise ratio (PSNR) and visual information fidelity (VIF) [14]. A straightforward way is to extend these 2D metrics to SIQA. The earliest pioneers who attempted to evaluate the quality of stereo images followed this strategy. Boev *et al.* combined the monoscopic quality component and the stereoscopic quality component for stereo quality assessment [15]. Considering that the stereoscopic images are different from the plane images because of the additional information of depth, YOU *et al.* investigated the capabilities of some common 2D quality metrics in SIQA, and added the depth information into quality assessment [16]. A similar approach was proposed by Benoit *et al.*, where two measures of 2D quality SSIM and C4 were augmented with disparity information by computing the square root of the difference between the reference and distorted disparities to predict the quality. However, these metrics are inefficient in predicting the perceived quality because the stimuli toward the perceived depth are quite different from those for 2D image quality [17]. Bosc *et al.* first questioned if it was appropriate to use 2D objective metrics and 2D subjective protocols to evaluate the quality of 3D contents [18].

During the recent years, the concept of Quality of Experience was proposed and widely used to reflect the overall quality experience of the subjects that were accessing and using the service provided. Some experts introduced this concept in the SIQA. The QoE of 3D refers to the unique aspects such as visual comfort, visual fatigue and other visual experience. Chen *et al.* proposed a 3D QoE by constructing visual experience as a weight sum of the image quality, depth quality and visual comfort [19]. Lin *et al.* adopted three quality components in their metric to evaluate the quality of stereoscopic video, namely the cyclopean view, binocular rivalry, and the scene geometry [20]. Qi used the relationship between the left and right views to reflect the QoE, and represented the structure of low-level features by using the phase congruency and saliency map [21].

Furthermore, some authors have taken a perceptual route in the development of SIQA algorithms. Shen *et al.* transformed the image by using the Laplacian pyramid and a directional filter-bank to simulate the multi-channels of HVS and then computed the Minkowski

summation of the error between the reference and distorted images to derive a quality [22]. Maalouf *et al.* integrated the left and right images into a cyclopean image to simulate the brain perception, and used the contrast sensitivity coefficients of the cyclopean image to lead a quality [23]. Ha *et al.* proposed a scheme for quality assessment of stereo images by considering the factors of temporal variation and disparity distribution [24]. Wang *et al.* proposed a SIQA metric by taking into account of the binocular spatial sensitivity to reflect the binocular fusion and suppression properties [25]. Bensalma *et al.* modeled the simple cells and complex cells of vision system, where the quality is given as the difference of associated binocular energy [26]. Shao *et al.* divided stereo images into monocular region, binocular fusion region and binocular suppression region, where the overall quality is given as the linear summation of three regions [27]. All the above metrics considered the characteristics of the HVS, either low-level or high-level. However, the key step of those metrics considering low-level characteristics of the HVS is stereo matching which needs an enormous quantity of calculations and is still an unsolved problem in stereo-related research. High-level HVS processing mechanism is still mysterious. Theories used in these models are generally the common knowledge and assumptions about the high-level HVS characteristics, which makes their quality prediction not convincing.

Recently, a new study has found the evidence that the HVS has separately adaptable channels for adding and subtracting the neural signals from the two eyes, supporting an unconventional view of the initial stages of stereopsis [28]. The study overthrew the traditional thought that stereopsis was achieved by combining signals from neurons that simultaneously detected objects in disparate parts of the two eyes' images and verified that binocular neurons that encoding the sum and the difference between the two stereo-halves are used for stereopsis. In our previous research, we evaluated the quality of stereo images from two perspectives: the objective quality of either image of the viewpoint pair and corresponding stereo sense among viewpoints [29]. In our experiment, we found that there was a strong correlation between the difference map and correlated disparity. In other words, difference map can be treated as an alternative of binocular disparity to evaluate the stereopsis which can also be called the stereo sense quality. While the summation contains the information of both views, the measurement of the summation can be regarded as the evaluation of image quality. The combination of the image quality and stereo sense quality derives from the overall perceived quality. In this paper, based on this new study and some low-level characteristics of the HVS, a full reference objective quality assessment metric is proposed for stereo images. Main contributions of our paper are as follows: 1). Analyze and present a brief introduction of related binocular visual characteristics. 2). Propose a novel idea of separately evaluating the quality of binocular summation and binocular difference. The former can be regarded as the image quality and the latter can be deemed as the stereo sensing quality. 3). In our metric, we do not estimate a disparity map, but use difference map instead. This innovation improves the efficiency of the proposed metric greatly and provides directions for the design of stereoscopic image quality algorithm without estimating a disparity map.

The rest of this paper is organized as follows. Section II introduces the theory of binocular addition and subtraction briefly. Section III presents the detailed implementation of the proposed metric. Section IV describes the experimental results and analysis. In Section V, we summarize our conclusions.

## Binocular Summation Channel and Binocular Difference Channel

The human visual system (HVS) is a complicated self-adapted optical nervous system which responds to the stimulation of external light signal and forms visual sense [30]. Our eyes view the world from slightly different angle, and the resulting small differences between the images in the two eyes are the basis of the stereopsis. Traditionally, it is believed that the stereopsis was

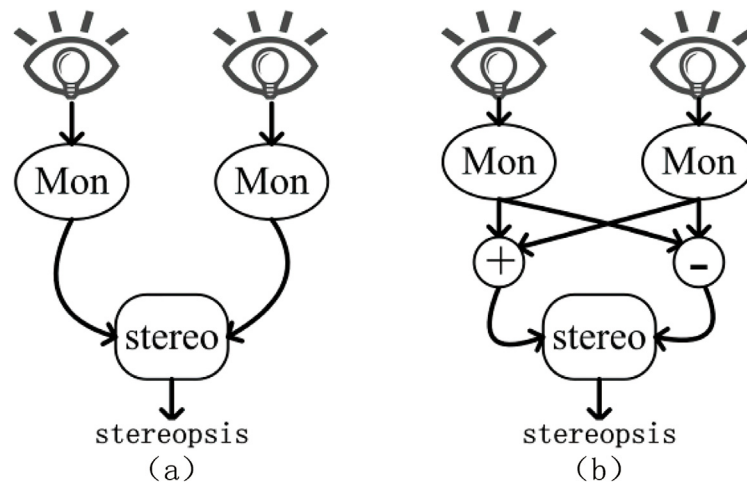

**Fig 1.** Two alternative hypothesis of the process of stereopsis, (a) Schematic diagram of traditional view, (b) Schematic diagram of recent discovery.

doi:10.1371/journal.pone.0145800.g001

achieved by combining the signals from the neurons that simultaneously detect the objects in disparate parts of the two eyes' images (shown in Fig 1(a)) [31]. However, an alternative view suggests that the binocular neurons first encode the summation and the difference between the two stereo halves and use them for stereopsis [32]. The speculation of the summation channel and difference channel has a long history. Until recently, an ingenious experiment designed by May *et al.* has produced convincing evidence that such channels exist [33]. The binocular summation channel (called the B+ channel) and binocular difference channel (called the B- channel) are independently adjustable (shown in Fig 1(b)). If there is no difference between the two stereo views, the binocular difference map would be blank, so the binocular difference map reveals the disparity between the two stereo views which are detected by the brain and used to construct the three-dimensional view. The binocular summation map shows the superposition of two views. With the help of binocular summation map, the system gets the ability to independently adjust the gains, or respond to strengths of the two channels which enable the system to compensate for the relatively weak B- signal found in the images of natural scenes. There are two advantages of having B+ and B- channels:

1. Because the left and right images of the stereo-pair are very similar and highly correlated, there is plentiful redundancy in the responses to the visual neurons that encode them. One way to reduce the redundancy is to convert the responses into sums and differences, as these are uncorrelated.
2. By taking the sums and differences of cone signals, the HVS produces a luminance-sensitive channel and color-sensitive channels, separately. These channels enable the HVS to 'decouple' the cone signals to improve the efficiency of information transmission along the visual pathway and enhance the ability to distinguish the luminance from color.

## 1 The Proposed Metric

The proposed metric is a full-reference objective methodology that works with luminance only and color inputs will be converted into gray scale for further analysis. The frame work of the proposed metric is shown in Fig 2. The process of our metric can be summarized into four steps: 1. Obtain binocular summation map and binocular difference map, and analyze their

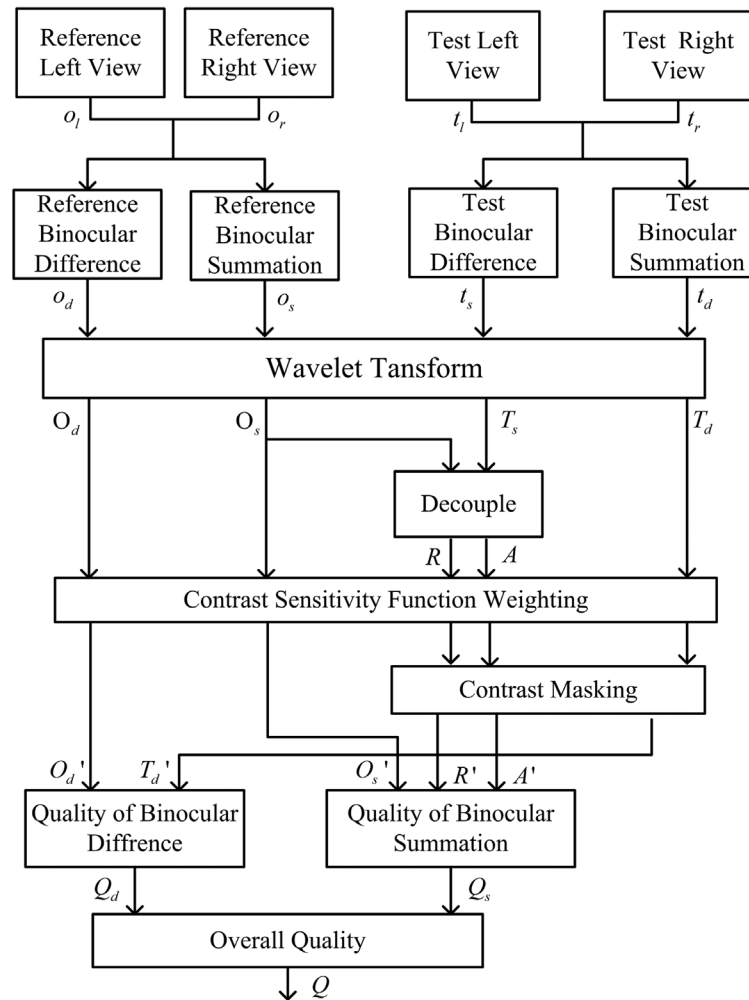

**Fig 2. Structure of the proposed metric.**

doi:10.1371/journal.pone.0145800.g002

characteristics. 2. Simulate the multi-channels and decouple binocular summation into two parts for further assessment. 3. Calculate the coefficient value by using the contrast sensitivity function and contrast masking. 4. Obtain the overall assessment by the nonlinear mapping and the adaptive combination of the quality of binocular summation and difference. Each section and the structure of the proposed metric are interpreted in details in the following parts.

### Binocular Summation and Binocular Difference

The experiments conducted in our previous work discovered that the absolute difference map of the viewpoint pair with human standard disparity was an approximate contour which implies that disparity performs most obviously on the edge of the objects [34]. Similar to the dense depth map, the absolute difference map also contains the high correlation information of stereo images and can be an alternative choice of the depth map to evaluate depth. The binocular summation map of test stereo pair contains the summation of both additive impairments and detail losses. Detail losses refer to the loss of useful visual information in the test stereo pair, while additive impairments refer to the redundant visual information which does not exist in the original but appears in the test pair only. By decoupling detail losses and additive

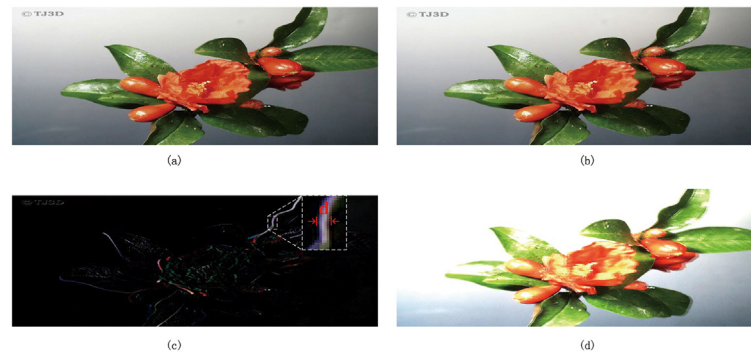

**Fig 3.** Summation and difference of stereo pair (a) Left view, (b) Right view, (c) binocular difference map and (d) binocular summation map.

doi:10.1371/journal.pone.0145800.g003

impairment from the binocular summation of the test image and comparing the difference with the reference summation, we can evaluate the quality of binocular summation.

Given  $L$  (left image) and  $R$  (right image), the binocular summation ( $S$ ) map and binocular difference ( $D$ ) map of a pair of stereo images can be calculated based on Eq (1) (shown in Fig 3).

$$\begin{cases} D = |L - R| \\ S = L + R \end{cases} \quad (1)$$

### Simulating Multi-channels and Decoupling Binocular Summation

Different types of neurons will be selectively sensitive to certain types of stimulation, such as the patterns of a particular frequency or orientation [35]. The visual psychology and physiology experiments have proven that there exist several independent frequency processing units in the HVS, which we call the multi-channels. Vimal and Ram found that there were several multiple frequency channels between  $30^\circ$  and  $60^\circ$  in human black-and-white vision; for human color vision, the similar channels are also found between  $60^\circ$  to  $130^\circ$  [36]. The existence of these independent channels has explained a variety of perceptual phenomena and offered a suggestion to divide visual excitation into several subbands at first for further process. To simulate this feature, we took process of discrete wavelet transform (DWT) to simulate this property (shown in Fig 4). In DWT, the inputting map is decoupled into different frequency subbands along with three different orientations (horizontal, vertical and diagonal).

As discussed in the previous section, the binocular summation of the test stereo pair contains the summation of both additive impairments and detail losses of two views. However, how to decouple the detail losses from the additive impairments was a key problem we were faced with. The algorithm proposed by Li makes it possible for us [37]. By using this algorithm, a test image is decoupled into two parts: the restored image (exhibits the same quantity of detail losses as the test image but is additive impairment free) and the additive impairments (contain no original image content but additive noises only) (shown in Fig 5). There are two advantages of using this decoupling algorithm:

1. Unlike some other existing restoration algorithms used for de-noising, de-blocking, de-blurring, super-resolution, etc., which intend to recover the original image as perfectly as possible by compensating the detail losses, the decoupling algorithm exhibits the same number of detail losses as the test image.
2. The decoupling algorithm is easy to implement with a small number of calculations.



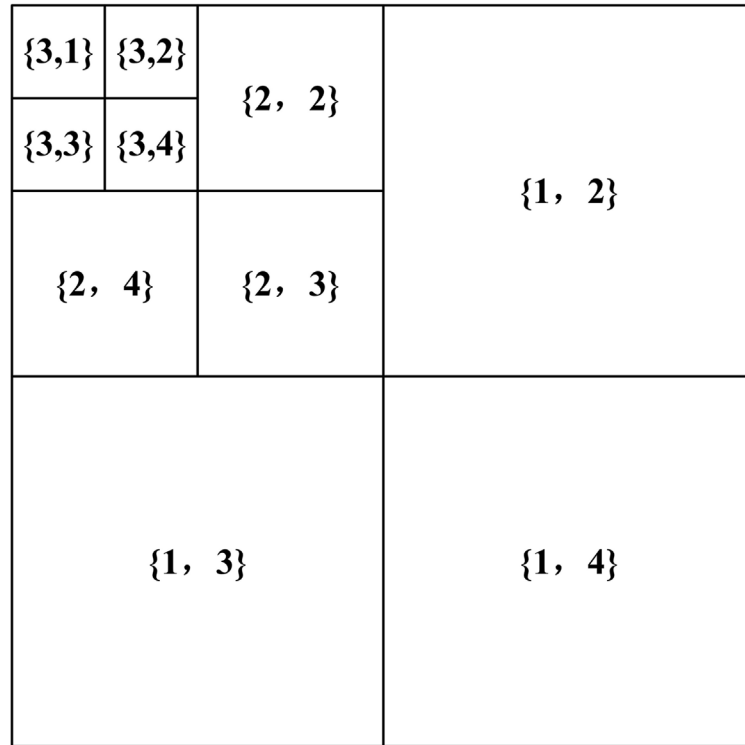

**Fig 4. Subbands indexing of DWT.** Each subband is indexed by a level  $\lambda$  and an orientation  $\theta$ .  $\theta = 2, 3, 4$  denote the vertical, horizontal, and diagonal subbands, respectively.

doi:10.1371/journal.pone.0145800.g004

By separately evaluating the quality of restored image and additive impairment and combining them in a proper way, we can easily gain the quality of binocular summation.

The DWT coefficients of original summation  $O_s(\lambda, \theta, i, j)$  and test summation  $T_s(\lambda, \theta, i, j)$  are given, where  $((\lambda, \theta, i, j))$  is the index of DWT subbands,  $\lambda$  is the level of the conversion,  $\theta =$

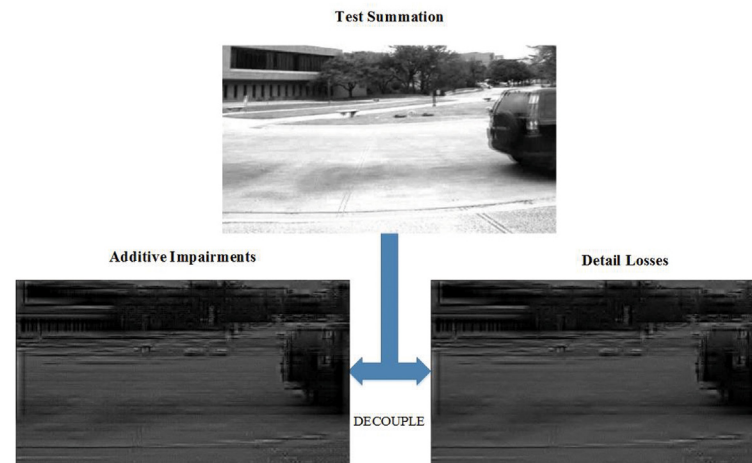

**Fig 5. Decoupling Result of Test Binocular Summation.**

doi:10.1371/journal.pone.0145800.g005

1 indicates the approximate subband,  $\theta = 2, 3, 4$  denotes the horizontal, vertical and diagonal subbands, respectively. We can decouple  $T_s(\lambda, \theta, i, j)$  as according to Eq (2).

$$R(\lambda, \theta, i, j) = \begin{cases} T_s(\lambda, \theta, i, j), & \theta = 1 \\ k(\lambda, \theta, i, j) \cdot O_s(\lambda, \theta, i, j), & otherwise \end{cases} \quad (2)$$

Where,  $R(\lambda, \theta, i, j)$  indicates the DWT coefficients of restored images which contain detail losses of the test summation,  $k(\lambda, \theta, i, j)$  indicates the scaled factor of each DWT coefficient of test summation and is constrained as:  $k(\lambda, \theta, i, j) \in [0, 1]$ .  $k(\lambda, \theta, i, j)$  is determined by the Eq (3).

$$k(\lambda, \theta, i, j) = \min \left( \max \left( \frac{T_s(\lambda, \theta, i, j)}{O_s(\lambda, \theta, i, j) + 10^{-30}}, 0 \right), 1 \right) \quad (3)$$

where the constant  $10^{-30}$  is introduced to avoid dividing by zero. Since DWT is a linear operation, we can directly get the DWT coefficient of additive impairment from the Eq (4).

$$A(\lambda, \theta, i, j) = T_s(\lambda, \theta, i, j) - R(\lambda, \theta, i, j) \quad (4)$$

For some special cases like the contrast enhancement, the visual quality will be improved instead of degradation, as long as the image contrast is too high to look natural. For these cases, instead of relaxing the constraint on the value, we use Eq (5) to distinguish the contrast enhancement. Each pair of DWT coefficient of original summation ( $O_s(\lambda, \theta = 2, i, j)$  and  $O_s(\lambda, \theta = 3, i, j)$ ) can be represented by using a point in the angular space.

$$\psi_t(\lambda, i, j) = \arctan \left( \frac{O_s(\lambda, \theta = 2, i, j)}{O_s(\lambda, \theta = 3, i, j) + 10^{-30}} \right) + \pi \times u(-O_s(\lambda, \theta = 3, i, j)) \quad (5)$$

Where  $u(\bullet)$  refers to the unit step function. Similarly, the angle of test summation is obtained. Then the absolute angle difference can be gained from Eq (6).

$$\psi_{diff}(\lambda, i, j) = |\psi_t(\lambda, i, j) - \psi_o(\lambda, i, j)| \cdot \frac{180}{\pi} \quad (6)$$

Different from other types of distortions, contrast enhancement will result in very small  $\psi_{diff}(\lambda, i, j)$ . In our experiment, the threshold of  $\psi_{diff}(\lambda, i, j)$  is set to  $1^\circ$ . Therefore, Eq (2) can be replaced by Eq (7).

$$R(\lambda, \theta, i, j) = \begin{cases} T_s(\lambda, \theta, i, j), & \theta = 1 \text{ or } \psi_{diff} < 1^\circ \\ k(\lambda, \theta, i, j) \cdot O_s(\lambda, \theta, i, j), & otherwise \end{cases} \quad (7)$$

### 1.1 Contrast Sensitivity Function and Contrast Masking

Contrast sensitivity refers to the minimum contrast value for a viewer to detect a stimulus. It is also the reciprocal of the contrast threshold. In psychovisual experiments of CSF, the subjects are required to view the sequential simple stimuli, like sine-wave gratings or Gabor patches [38]. These stimuli are presented with its contrast which gradually increases or decreases. The contrast is determined when the stimulus is just perceived or unperceived by the observers.



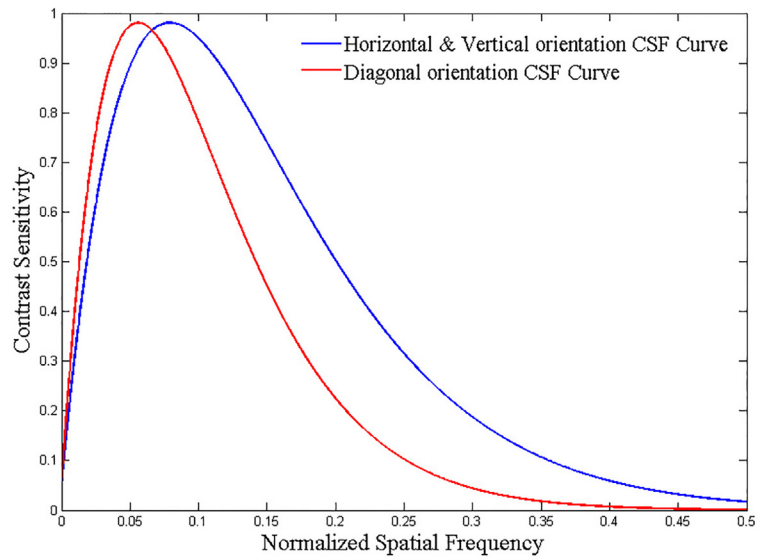

**Fig 6. CSF curve.**

doi:10.1371/journal.pone.0145800.g006

The experiments indicate that the contrast sensitivity of the HVS depends on the characteristics of the stimuli such as orientation, and spatial frequency. The CSF curve peaks at the middle frequency and drops with both increasing and decreasing frequencies. Fig 6 shows the CSF curves of horizontal or vertical orientation and diagonal orientation. In our experiments, we used the CSF model proposed by Zhang [39]. The CSF model can be generalized as follows:

$$H(\omega) = (a + b \cdot \omega) \cdot \exp(-c \cdot \omega) \tag{8}$$

Where,  $a = 0.31$ ,  $b = 0.69$ ,  $c = 0.29$  and  $\omega$  is the spatial frequency in cycles per degree (cpd) of visual angle. The nominal spatial frequency  $F(\lambda, \theta)$  of each level  $\lambda$  can be obtained from Eq (9).

$$\begin{cases} F(\lambda, \theta) = \frac{\pi \cdot f_s \cdot d}{180 \cdot h \cdot 2^i} & \theta = 2, 3 \\ F(\lambda, \theta) = \frac{\pi \cdot f_s \cdot d}{180 \cdot h \cdot 2^i \cdot \sqrt{2}}, & \theta = 1 \end{cases} \tag{9}$$

By calculating the contrast sensitivity function, the CSF weighed factors can be obtained and assigned to each subband.

Contrast Masking (CM) is the visibility threshold caused by the presence of a masker signal. Masking occurs when a stimulus that is visible by itself can no longer be perceived due to the presence of another stimulus [39]. In psychovisual experiment, the threshold is derived by superposing the target signal onto the masker signal. Generally, the experiment reveals that masker contrast is higher, and similarity between the target and the masker in spatial frequency is closer, and that orientation or phase leads to a higher target visibility threshold. Watson suggested that the contrast masking should be calculated over a broad range of orientation but only a limited range of space and spatial frequencies [40]. Therefore, we simply used Eq (10) to

|             |             |             |
|-------------|-------------|-------------|
| <b>1/30</b> | <b>1/30</b> | <b>1/30</b> |
| <b>1/30</b> | <b>1/30</b> | <b>1/30</b> |
| <b>1/30</b> | <b>1/30</b> | <b>1/30</b> |

**Fig 7. Weighting matrix  $w$  used in contrast masking.**

doi:10.1371/journal.pone.0145800.g007

calculate the CM thresholds.

$$MT_{\lambda} = \sum_{\theta=1}^3 |M_{(\lambda, \theta)}| \otimes w \tag{10}$$

Where,  $|M_{(\lambda, \theta)}|$  is the absolute DWT sub-band of masker signal,  $w$  is a  $3 \times 3$  weighting matrix (shown in Fig 7) and operator  $\otimes$  indicates convolution. For restored image and additive impairment, one's presence will affect the visibility of the other. Therefore they are treated as the masker of each other. While for the binocular difference of the test image, the original binocular difference map can serve as the masking signal to adjust the distortions. We simply took it as the masker.

Finally, we got the result of contrast masking ( $A', R', T_d'$ ) by taking the absolute CSF-weighted DWT coefficients, to subtract the corresponding CM threshold obtained from Eq (10), and clip the resultant negative values to 0. For original binocular summation and difference, we just calculated their CSF-weighted coefficients for further calculation without contrast masking processing.

### 1.2 Overall Assessment Performance

After CSF-weighting and contrast masking, we can get the masked additive impairments of binocular-summation  $A'$ , restored image of binocular-summation  $R'$  and masked test image of binocular-difference  $T_d'$ . For the assessment of binocular summation, we adopted the Minkowski merger to pool the detail loss and additive impairment. The pooling equivalent is given

in Eq (11).

$$\left\{ \begin{aligned} q_1 &= \frac{\sum_{\lambda=1}^4 \sum_{\theta=2}^4 \left[ \sum_{i,j \in center} R'(i, j, \lambda, \theta)^{\beta_s} \right]^{1/\beta_s}}{\sum_{\lambda=1}^4 \sum_{\theta=2}^4 \left[ \sum_{i,j \in center} O'_s(i, j, \lambda, \theta)^{\beta_s} \right]^{1/\beta_s}} \\ q_2 &= \frac{\sum_{\lambda=1}^4 \sum_{\theta=2}^4 \left[ \sum_{i,j \in center} A'(i, j, \lambda, \theta)^{\beta_s} \right]^{1/\beta_s}}{N} \end{aligned} \right. \quad (11)$$

Where  $N$  is the number of pixels and  $i, j \in center$  means that only the central region of each subband is used in the pooling. It is used to overcome the edge effect of the wavelet transform.  $\beta_s$  is the polling factor determined. The final assessment score of binocular-summation can be gained from Eq (12) by combining  $q_1$  with  $q_2$ .

$$Q_s = q_1 + \alpha_1 \cdot \left( 0.5 - \frac{1}{1 + \exp(\alpha_2 \cdot q_2)} \right) \quad (12)$$

For the assessment of binocular difference, as discussed in section II – A, the absolute disparity map is an approximate contour which contains the high correlation information of stereo images. Therefore, we adopted the CSF-weighted structural similarity metric to evaluate the quality of the binocular difference as shown in Eq (13).

$$Q_d = \sum_{\lambda=1}^4 \sum_{\theta=1}^4 \omega_{\lambda, \theta} \cdot \frac{(2\mu_{x,y} + C_1)(2\sigma_{x,y} + C_2)}{(\mu_x^2 + \mu_y^2 + C_1)(\sigma_x^2 + \sigma_y^2 + C_2)} \quad (13)$$

Where,  $\mu_x$  and  $\mu_y$  are the average of  $T_d(\lambda, \theta)$  and  $O_d(\lambda, \theta)$ , respectively.  $\sigma_x$  and  $\sigma_y$  are their variance,  $\sigma_x y$  is their covariance,  $\omega_{\lambda, \theta}$  is the CSF-weighted factor assigned to each orientation of each sub-band,  $C_1$  and  $C_2$  are constants determined in the experiments.

In order to combine the assessment of binocular summation with the assessment of binocular difference, a necessary step is nonlinear mapping. The nonlinear function applied in our experiment is as shown in Eq (14).

$$Q' = \beta_1 \cdot \left( 0.5 - \frac{1}{1 + \exp(\beta_2 \cdot (Q - \beta_3))} \right) + \beta_4 \cdot Q + \beta_5 \quad (14)$$

After nonlinear mapping, the overall quality score can be expressed as Eq (15).

$$Q = \omega_s Q'_s + \omega_d Q'_d \quad (15)$$

Where  $Q'_s$  and  $Q'_d$  are the nonlinear mapping result of  $Q_s$  and  $Q_d$ , respectively.  $\omega_s$  and  $\omega_d$  are constants determined by the experiment and restricted by Eq (16).

$$\left\{ \begin{aligned} \omega_s + \omega_d &= 1 \\ 0 < \omega_s < 1 \\ 0 < \omega_d < 1 \end{aligned} \right. \quad (16)$$

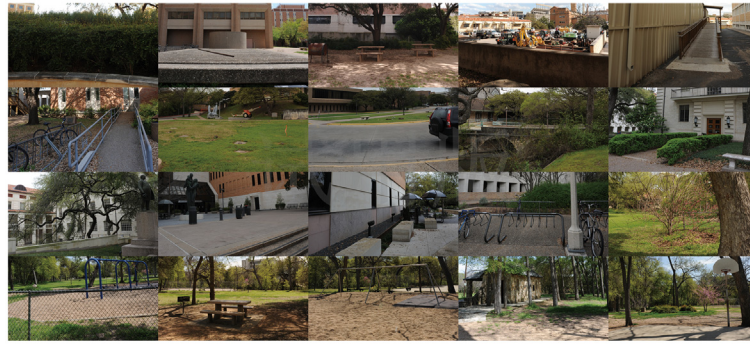

**Fig 8. 20 left views of original stereo image pairs.**

doi:10.1371/journal.pone.0145800.g008

## Experimental Result and Analysis

### Stereo Database

The stereo subjectively-rated image database used in our experiment is LIVE 3D Image Quality Database of the University of Texas at Austin (phase 1) [19]. The main interest of this database is the availability of subjective scores which allows the study on the correlation between the experimental results and human judgment. Besides, the most existing metrics for stereoscopic images work on the database of their own, which are either private or unavailable for us to compare or lack in subjective ratings. To get a more objective and impartial evaluation, we adopted the third party database. We selected 20 pairs of original stereo images (shown in Fig 8) and 365 pairs of distorted stereo images for comparison. Distorted stereo pairs contain five types of distortions, including JPEG, JPEG2000 compression, additive white noise, blur and fast fading (shown in Fig 9).

### Performance Measures and Parameters Determination

To evaluate the predictive performance of the proposed metric, four common performance measures, including the Pearson linear correlation coefficient ( $PLCC$ ), the root mean squared error ( $RMSE$ ), the Spearman rank-order correlation coefficient ( $SROCC$ ) and Kendall rank-order correlation coefficient ( $KROCC$ ), were adopted. The  $PLCC$  and  $RMSE$  are used to measure the prediction accuracy and are defined in Eqs (17) and (18). The  $SROCC$  and  $KROCC$  are used to evaluate the prediction monotonicity. For a perfect match of objective and subjective

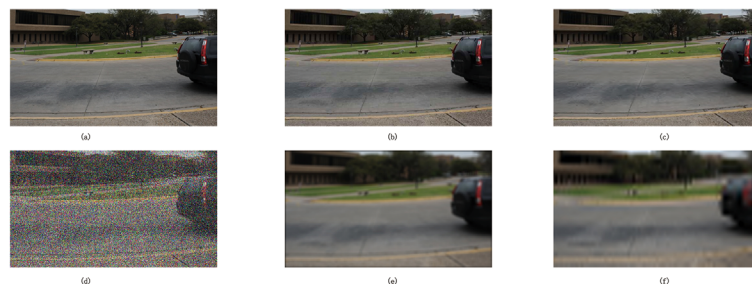

**Fig 9. One of the original left view images and the corresponding five types of distortion.** (a) Original left view. (b) JPEG compressed. (c) JPEG 2000 compressed. (d) White noise. (e) Blur. (f) Fast fading.

doi:10.1371/journal.pone.0145800.g009

scores,  $RMSE = 0$  and  $PLCC = SROCC = KROCC = 1$ .

$$PLCCC(X, Y) = \frac{\sum_{i=1}^n (X_i - \bar{X}_i)(Y_i - \bar{Y}_i)}{\sqrt{\sum_{i=1}^n (X_i - \bar{X}_i)^2 \sum_{i=1}^n (Y_i - \bar{Y}_i)^2}} \quad (17)$$

$$RMSE(X, Y) = \sqrt{\frac{1}{n} \sum_{i=1}^n (X_i - Y_i)^2} \quad (18)$$

In the proposed metric, five parameters need to be determined i.e., the pooling component  $\beta_S$  in Eq (12),  $\alpha_1, \alpha_2$  in Eq (13), and weighting factors  $\omega_S, \omega_d$  in Eq (18). The strategy we used in parameterization is to select the parameters, which depends on how well the resulting models match the physiological and psychophysical experiment. The parameter result is  $\beta_S = 3, \alpha_1 = 1.1, \alpha_2 = 515, \omega_S = 0.465$ , and  $\omega_d = 0.535$ .

### Overall Performance

In this section, we compared the performance of the proposed metric with several implementations of commonly used 2D metrics i.e. PSNR, SSIM and ADM [37], and two existing schemes for stereo images, Benoit’s scheme [17], Chen’s scheme [19] and Lin’s scheme [20]. The score measured by 2D metrics will be given as the average score of the left and right view. For Benoit’s scheme, we adopted the  $d1$  metric proposed in the paper, in which the 2D metric is SSIM and disparity distortion is estimated by using the global correlation coefficient between the original and distorted disparity maps. For Chen’s scheme, the 2D metric adopted is SSIM. Since all schemes require estimated disparity maps, we use the same stereo matching algorithm [41] to create the disparity maps. Fig 10 shows the scatter plots of six metrics respectively. The vertical axis denotes the subjective score of perceptual quality and the horizontal axis denotes the predicted score of each metric. From the scatter plots, we can see that the scatter points of the proposed metric are more concentrated to the diagonal than other metrics. The PSNR performs the worst compared with the other metrics, because the scatter points are chaotic and not obviously correlated with DMOS. The maximum error between PSNR and DMOS is up to 47% and the mean error is 30%. Therefore, the PSNR should not be used as a metric to evaluate the quality of stereo images. The scatter points of SSIM is more concentrated to the diagonal, but the maximum error and mean error are still high up to 43% and 26%, respectively. The maximum error and mean error of the proposed metric are 17% and 9% respectively, which are the lowest among all metrics.

To provide an intuitive instructions of each metric, Table 1 shows the values of  $PLCC, RMSE, SROCC$  and  $KROCC$  of each metric where the indicator that gives the best performance is highlighted in bold. From the table we can see that the proposed metric is more prominent than the other metrics. The decouple algorithm used in our metric is from [37] but our metric performs much better. It proves that stereo sensing quality plays an important role in predicting the quality of stereoscopic images. The performance of the Benoit’s scheme is lower than the 2D-IQA ADM but is better than its related 2D-IQA SSIM. On one hand it emphasizes the importance of stereo sensing quality in predicting the perceived quality of stereoscopic images and the addition of disparity can improve the performance to a certain extent; on the other hand, it reveals the deficiency of these metrics that the quality of the estimated disparity is highly dependent on the stereo matching algorithms. In our metric, we do not need to estimate a disparity map. Instead we use the difference map which is another form to show stereo

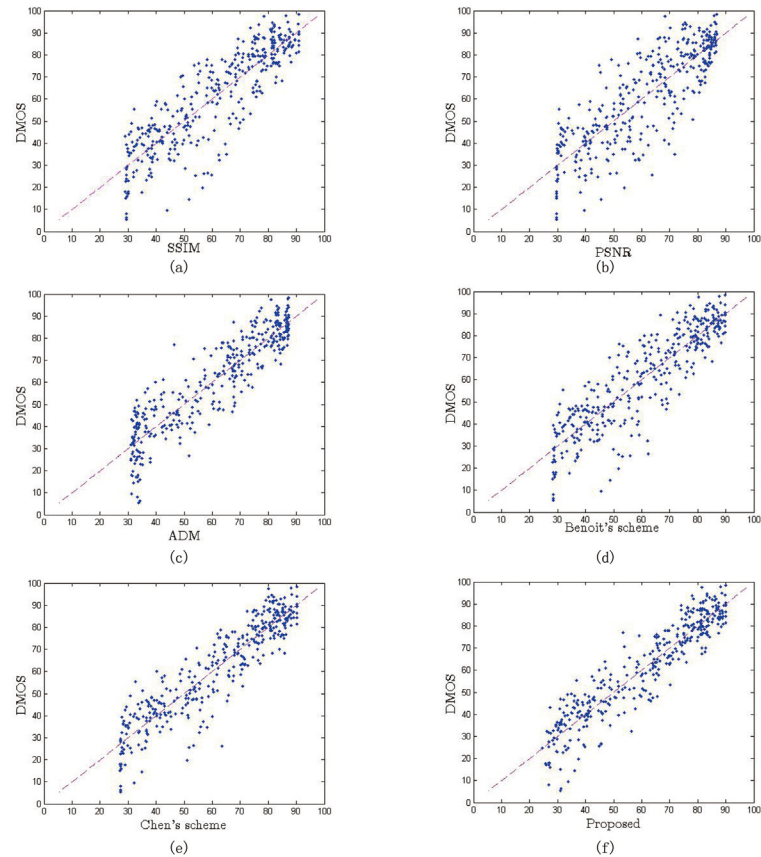

**Fig 10.** Scatter plots of objective scores versus subjective scores for the eight metric, (a)SSIM, (b)PSNR, (c) ADM, (d) Benoit's scheme, (e) Chen's scheme, and (f) Proposed scheme.

doi:10.1371/journal.pone.0145800.g010

sensing as a replacement. The use of difference maps not only reduces our risk that the performance of the metric depends on the stereo matching metric used, but also saves time of estimating a disparity map. The run time of each metric is given as [Table 2](#) where the Total Time is the total elapsed time to predict the quality of all distorted stereoscopic images included in

**Table 1. Performance comparison.**

|       | PSNR    | SSIM    | ADM    | Benoit's scheme | Lin's Scheme | Chen's scheme | Proposed      |
|-------|---------|---------|--------|-----------------|--------------|---------------|---------------|
| PLCC  | 0.8345  | 0.8725  | 0.9119 | 0.8829          | 0.8645       | 0.9166        | <b>0.9303</b> |
| SROCC | 0.8341  | 0.8757  | 0.9083 | 0.8862          | 0.8559       | 0.9157        | <b>0.9263</b> |
| KROCC | 0.6297  | 0.6792  | 0.7187 | 0.6907          | 0.6559       | 0.7368        | <b>0.7536</b> |
| RMSE  | 12.0480 | 10.6841 | 8.9752 | 10.2681         | 10.9898      | 8.7406        | <b>8.0189</b> |

doi:10.1371/journal.pone.0145800.t001

**Table 2. Run Time of each metric.**

|                  | PSNR     | SSIM     | ADM       | Benoit's scheme | Lin's scheme | Chen's scheme | Proposed  |
|------------------|----------|----------|-----------|-----------------|--------------|---------------|-----------|
| Total Time (s)   | 34.734 s | 92.081 s | 143.257 s | 9268.470 s      | 9846.461     | 9309.223 s    | 207.127 s |
| Average Time (s) | 0.095 s  | 0.252 s  | 0.463 s   | 25.393 s        | 26.976       | 25.505 s      | 0.567 s   |
| Self Time (s)    | 3.272 s  | 3.149 s  | 2.7132 s  | 6.155 s         | 2.561 s      | 0.624 s       | 1.105 s   |

doi:10.1371/journal.pone.0145800.t002



**Table 3. Performance comparison of each distortion.**

| Distortions | Criteria | PSNR    | SSIM    | ADM           | Benoit's scheme | Lin's scheme | Chen's scheme | Proposed      |
|-------------|----------|---------|---------|---------------|-----------------|--------------|---------------|---------------|
| JEPG        | PLCC     | 0.2187  | 0.4871  | 0.6719        | 0.5579          | 0.2866       | 0.6342        | <b>0.6777</b> |
|             | SROCC    | 0.2183  | 0.4347  | 0.5926        | 0.5189          | 0.2996       | 0.5582        | <b>0.6010</b> |
|             | KROCC    | 0.1797  | 0.2818  | 0.4009        | 0.3490          | 0.2461       | 0.3718        | <b>0.4805</b> |
|             | RMSE     | 8.5079  | 7.6146  | 6.4578        | 7.2360          | 8.3531       | 6.7433        | <b>6.4111</b> |
| JEPG2000    | PLCC     | 0.7851  | 0.8650  | 0.9333        | 0.8897          | 0.8381       | 0.9164        | <b>0.9376</b> |
|             | SROCC    | 0.7993  | 0.8581  | 0.9008        | 0.8701          | 0.8388       | 0.8956        | <b>0.9026</b> |
|             | KROCC    | 0.5918  | 0.6563  | 0.7158        | 0.6696          | 0.6386       | 0.7139        | <b>0.7259</b> |
|             | RMSE     | 10.6954 | 8.6632  | <b>6.0009</b> | 7.8853          | 9.4210       | 6.9136        | 6.0037        |
| White Noise | PLCC     | 0.9349  | 0.9384  | 0.9211        | 0.9360          | 0.9280       | <b>0.9432</b> | 0.9213        |
|             | SROCC    | 0.9316  | 0.9387  | 0.9236        | 0.9347          | 0.9284       | <b>0.9481</b> | 0.9264        |
|             | KROCC    | 0.7665  | 0.7848  | 0.7608        | 0.7753          | 0.7614       | <b>0.8025</b> | 0.7620        |
|             | RMSE     | 7.8700  | 7.6623  | 8.6342        | 7.8058          | 8.2618       | <b>7.3690</b> | 8.6231        |
| Blur        | PLCC     | 0.9156  | 0.9607  | 0.8987        | 0.9256          | 0.9475       | 0.416         | <b>0.9511</b> |
|             | SROCC    | 0.9020  | 0.8793  | 0.8891        | 0.8967          | 0.9345       | <b>0.9261</b> | 0.9217        |
|             | KROCC    | 0.7333  | 0.7192  | 0.7859        | 0.7354          | 0.7859       | <b>0.7717</b> | 0.7576        |
|             | RMSE     | 7.7594  | 7.6206  | 5.3549        | 7.3052          | 6.1721       | 6.4977        | <b>5.9619</b> |
| Fast Fading | PLCC     | 0.7026  | 0.7207  | <b>0.8549</b> | 0.7514          | 0.7086       | 0.7575        | 0.8272        |
|             | SROCC    | 0.5875  | 0.5871  | <b>0.8154</b> | 0.6142          | 0.6581       | 0.6879        | 0.7734        |
|             | KROCC    | 0.4168  | 0.4308  | <b>0.6289</b> | 0.4561          | 0.4719       | 0.5118        | 0.5865        |
|             | RMSE     | 11.7900 | 11.4857 | <b>8.5957</b> | 10.9314         | 11.6895      | 10.8152       | 9.3087        |

doi:10.1371/journal.pone.0145800.t003

the stereo database, Average Time is the average time spent to predict the quality of a single pair, Self Time is the time spent of the main function excluding the time spent in its child functions. Self Time also includes overhead resulting from the process of profiling. From the table we can see that the running-speed of the proposed metric is faster than Benoit's scheme and Chen's scheme because both schemes need to estimate a disparity map. The running-speed of the proposed metric is lower than 2D-IQA but is not far behind.

However a good performance of overall quality prediction does not necessarily mean a good performance for a certain distortion type. Table 3 shows the value of PLCC, RMSE, SROCC and KROCC of each distortion type. From the table we can see that PSNR is a useful measure only for additive white noise. Chen's scheme performs better for distortion of blur and fast fading. Shao's scheme is not very capable in dealing with the distortion of "noise". The proposed scheme is less effective in predicting JEPG, JEPG2000 compressed distorted image quality but the overall performance of the proposed metric is better than the Benoit's scheme and Chen's scheme in general.

To better illustrate the relationship between the DMOS and objective metrics discussed in this paper, the statistic results of 18 distorted image pairs of a stereo pair are shown in Fig 11. From the statistic results, we can see that the trend of the proposed metric is the closest to the trend of DMOS among all metrics. The Lin's scheme, Benoit's scheme, Chen's scheme and ADM also show high correlation with DMOS. There's no obvious relationship between the trend of PSNR and DMOS.

Since the proposed metric contains two parts, the performance of each part is also evaluated. Fig 12 shows performance of each part and the overall quality, the binocular summation part is named Scheme A while the binocular difference part is named Scheme B. In order to illustrate clearer, the RMSE value is reduced tenfold. It is obvious that the overall quality yield a higher correlation with the subjective value than both part. We further investigated the role that

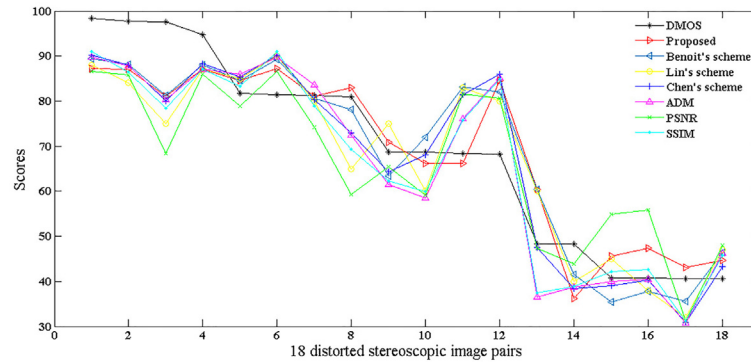

**Fig 11. 10 statistic results of 18 distorted pairs of an original pair.**

doi:10.1371/journal.pone.0145800.g011

binocular summation and binocular difference played that contribute to this result and found that for JPEG, JPEG 2000 compression and additive white noise distortions, the score of binocular summation is high, while the score of binocular difference is relatively low. The reason is that these types of distortions make greater distortions for binocular summation but small structure distortion for binocular difference which is opposite to blur and fast fading. The overall score absorbs the advantages of binocular summation and binocular difference, which makes the overall performance consistent with subjective scores. This result however in some ways have prove the existence of binocular decouple channels of binocular difference and binocular summation at the initial phase of stereopsis.

### Result On Other Database

To further verify the proposed method, more 3D IQA Database need to be used. However, some of 3D IQA Databases are either not publicly available or absent of subjective assessment value. To solve this problem, the SVBL 3D IQA Database (Stereo Image Database of Stereo Vision and Bio-Optics Laboratory from School of Electronic and Information Engineering, Tianjin University [29]) was used to further verify the proposed method. The SVBL 3D IQA Database contains 360 distorted stereopairs and 30 original stereopairs. Each stereoscopic

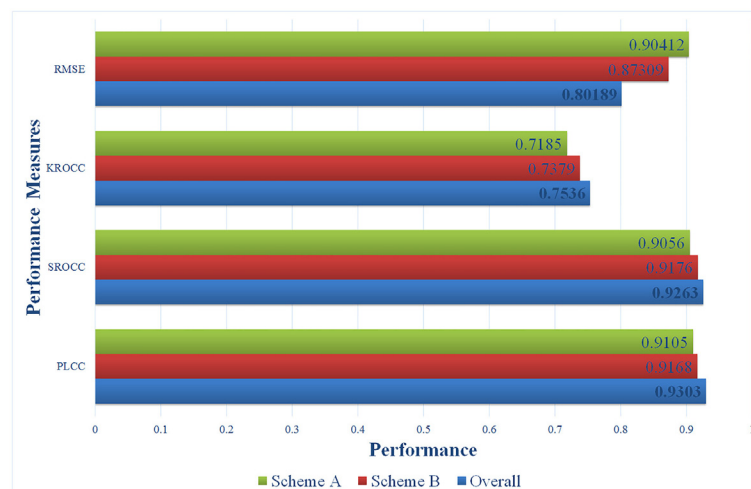

**Fig 12. Performance comparison of each part and overall.**

doi:10.1371/journal.pone.0145800.g012

**Table 4. Performance comparison on SVBL 3D database.**

|       | PSNR     | SSIM   | ADM     | Benoit's scheme | Lin's scheme | Chen's scheme | Proposed      |
|-------|----------|--------|---------|-----------------|--------------|---------------|---------------|
| PLCC  | 0.8257   | 0.9060 | 0.8789  | 0.8583          | 0.9097       | 0.9143        | <b>0.9227</b> |
| SROCC | 0.0.8076 | 0.8986 | 0.8812  | 0.8336          | 0.9009       | 0.9103        | <b>0.9149</b> |
| KROCC | 0.5996   | 0.7476 | 0.6900  | 0.6349          | 0.7594       | 0.7728        | <b>0.7392</b> |
| RMSE  | 12.6772  | 9.9756 | 10.6487 | 12.2205         | 10.0128      | 9.0385        | <b>8.5423</b> |

doi:10.1371/journal.pone.0145800.t004

image in this database has been evaluated by human subjects, and assigned a quantitative subjective quality score [42]. The performance numbers (*PLCC*, *SROCC*, *KROCC* and *RMSE*) of 2D metrics and compared 3D QA models on SVBL 3D IQA database is given in Table 4.

From the table we can conclude that the proposed metric performs best among all metrics. Both the proposed metric and Chen's scheme perform better than 2D IQA metrics. Chen's scheme performs well because it also considers some characteristics of human visual system. However the Chen's scheme only considered binocular combination characteristic and failed in investigating the stereopsis production process. Though Lin's scheme considered binocular integration behaviors, its performance is mediocre. That is because on the one hand, the algorithm was specifically designed to predict the quality of 3D image compression and could not be applicable to other types of distortions, on the other hand it ignored the procedure of stereopsis. Benoit's Scheme failed in both databases, from which we can conclude that it doesn't work to derive a stereo quality assessment metric by simply combining existing 2D metrics with disparity maps without considering stereoscopic visual characteristics.

## Conclusion

According to the human eye's two processing channels: binocular summation channel and binocular difference channel, this paper proposes an objective quality assessment metric for stereoscopic images. The proposed metric introduces the binocular visual characteristics which can greatly improve the performance of the metric. Also, the proposed metric is free of depth maps which makes our metric more efficient and effective. The experiment results based on LIVE 3D database and SVBL database indicate the effectiveness of the proposed quality metric in matching subjective ratings. The proposed metric has indirectly proved the existence of binocular decoupling channels which are binocular summation channel and binocular difference channel which also inspire us to prove hypothesis by reasonable application. Our future work will explore application of some other HVS characteristics in quality assessment of stereoscopic images. Verify some hypothesis of stereoscopic visual characteristics by some experiments or applying them into our metric and extend our metric to stereoscopic video quality assessment.

## Acknowledgments

This research is partially supported by the National Natural Science Foundation of China (No.61471260 and No.61271324), Supported by Program for New Century Excellent Talents in University (NCET-12-0400). This work is also supported by the Specialized Research Fund for the Doctoral Program of Higher Education of China (Grant No. 20136118120010) and China Postdoctoral Science Foundation (No.2013M542370)

## Author Contributions

Conceived and designed the experiments: JY YL ZG ZL WW HS. Performed the experiments: JY YL ZG ZL WW HS. Analyzed the data: JY YL ZG ZL WW HS. Contributed reagents/

materials/analysis tools: JY YL ZG ZL WW HS. Wrote the paper: JY YL ZG ZL WW HS. Guidance and specific recommendations for revision: JY YL ZG ZL WW HS.

## References

1. Xu C, Tao D, Xu C. Large-margin multi-view information bottleneck. *Pattern Analysis and Machine Intelligence, IEEE Transactions on*. 2014; 36(8):1559–1572. doi: [10.1109/TPAMI.2013.2296528](https://doi.org/10.1109/TPAMI.2013.2296528)
2. Wang Y, Jiang Y. Integration of 3D structure from disparity into biological motion perception independent of depth awareness. *PloS one*. 2014; 9(2):e89238. doi: [10.1371/journal.pone.0089238](https://doi.org/10.1371/journal.pone.0089238) PMID: [24586622](https://pubmed.ncbi.nlm.nih.gov/24586622/)
3. Zhang G, Jia J, Wong TT, Bao H. Consistent depth maps recovery from a video sequence. *Pattern Analysis and Machine Intelligence, IEEE Transactions on*. 2009; 31(6):974–988. doi: [10.1109/TPAMI.2009.52](https://doi.org/10.1109/TPAMI.2009.52)
4. Chen CW, Cho M, Huang YP, Javidi B. Improved viewing zones for projection type integral imaging 3D display using adaptive liquid crystal prism array. *Display Technology, Journal of*. 2014; 10(3):198–203. doi: [10.1109/JDT.2013.2293272](https://doi.org/10.1109/JDT.2013.2293272)
5. Batista J, Araújo H, et al. Stereoscopic depth perception using a model based on the primary visual cortex. *PloS one*. 2013; 8(12):e80745. doi: [10.1371/journal.pone.0080745](https://doi.org/10.1371/journal.pone.0080745) PMID: [24339881](https://pubmed.ncbi.nlm.nih.gov/24339881/)
6. Shibata T, Kim J, Hoffman DM, Banks MS. Visual discomfort with stereo displays: Effects of viewing distance and direction of vergence-accommodation conflict. In: *IS&T/SPIE Electronic Imaging*. International Society for Optics and Photonics; 2011. p. 78630P–78630P.
7. Zhou F, Lu Z, Wang C, Sun W, Xia ST, Liao Q. Image Quality Assessment Based on Inter-Patch and Intra-Patch Similarity. *PloS one*. 2015; 10(3):e0116312. doi: [10.1371/journal.pone.0116312](https://doi.org/10.1371/journal.pone.0116312) PMID: [25793282](https://pubmed.ncbi.nlm.nih.gov/25793282/)
8. Zhou J, Jiang G, Mao X, Yu M, Shao F, Peng Z, et al. Subjective quality analyses of stereoscopic images in 3DTV system. In: *Visual Communications and Image Processing (VCIP), 2011 IEEE*. IEEE; 2011. p. 1–4.
9. Lee JS, Goldmann L, Ebrahimi T. Paired comparison-based subjective quality assessment of stereoscopic images. *Multimedia tools and applications*. 2013; 67(1):31–48. doi: [10.1007/s11042-012-1011-6](https://doi.org/10.1007/s11042-012-1011-6)
10. IJsselstein WA, de Ridder H, Vliegen J. Subjective evaluation of stereoscopic images: effects of camera parameters and display duration. *Circuits and Systems for Video Technology, IEEE Transactions on*. 2000; 10(2):225–233. doi: [10.1109/76.825722](https://doi.org/10.1109/76.825722)
11. Wöpking M. Viewing comfort with stereoscopic pictures: An experimental study on the subjective effects of disparity magnitude and depth of focus. *Journal of the society for information display*. 1995; 3(3):101–103. doi: [10.1889/1.1984948](https://doi.org/10.1889/1.1984948)
12. Akhter R, Sazzad ZP, Horita Y, Baltés J. No-reference stereoscopic image quality assessment. In: *IS&T/SPIE Electronic Imaging*. International Society for Optics and Photonics; 2010. p. 75240T–75240T.
13. Wang Z, Bovik AC, Sheikh HR, Simoncelli EP. Image quality assessment: from error visibility to structural similarity. *Image Processing, IEEE Transactions on*. 2004; 13(4):600–612. doi: [10.1109/TIP.2003.819861](https://doi.org/10.1109/TIP.2003.819861)
14. Sheikh HR, Bovik AC. Image information and visual quality. *Image Processing, IEEE Transactions on*. 2006; 15(2):430–444. doi: [10.1109/TIP.2005.859378](https://doi.org/10.1109/TIP.2005.859378)
15. Boev A, Gotchev A, Egiazarian K, Aksay A, Aka GB. Towards compound stereo-video quality metric: a specific encoder-based framework. In: *Image Analysis and Interpretation, 2006 IEEE Southwest Symposium on*. IEEE; 2006. p. 218–222.
16. You J, Xing L, Perkis A, Wang X. Perceptual quality assessment for stereoscopic images based on 2D image quality metrics and disparity analysis. In: *Proc. of International Workshop on Video Processing and Quality Metrics for Consumer Electronics*, Scottsdale, AZ, USA; 2010..
17. Benoit A, Le Callet P, Campisi P, Cousseau R. Using disparity for quality assessment of stereoscopic images. In: *Image Processing, 2008. ICIP 2008. 15th IEEE International Conference on*. IEEE; 2008. p. 389–392.
18. Bosc E, Pepion R, Le Callet P, Köppel M, Ndjiki-Nya P, Pressigout M, et al. Towards a new quality metric for 3-D synthesized view assessment. *Selected Topics in Signal Processing, IEEE Journal of*. 2011; 5(7):1332–1343. doi: [10.1109/JSTSP.2011.2166245](https://doi.org/10.1109/JSTSP.2011.2166245)
19. Chen MJ, Su CC, Kwon DK, Cormack LK, Bovik AC. Full-reference quality assessment of stereopairs accounting for rivalry. *Signal Processing: Image Communication*. 2013; 28(9):1143–1155.

20. Lin YH, Wu JL. Quality assessment of stereoscopic 3D image compression by binocular integration behaviors. *Image Processing, IEEE Transactions on*. 2014; 23(4):1527–1542. doi: [10.1109/TIP.2014.2302686](https://doi.org/10.1109/TIP.2014.2302686)
21. Qi F, Jiang T, Ma S, Zhao D. Quality of experience assessment for stereoscopic images. In: *Circuits and Systems (ISCAS), 2012 IEEE International Symposium on*. IEEE; 2012. p. 1712–1715.
22. Shen L, Gao Q. Objective quality assessment of stereo images with Human Visual characteristic. In: *Image and Signal Processing (CISP), 2012 5th International Congress on*. IEEE; 2012. p. 1119–1123.
23. Maalouf A, Larabi MC. CYCLOP: A stereo color image quality assessment metric. In: *Acoustics, Speech and Signal Processing (ICASSP), 2011 IEEE International Conference on*. IEEE; 2011. p. 1161–1164.
24. Ha K, Kim M. A perceptual quality assessment metric using temporal complexity and disparity information for stereoscopic video. In: *Image Processing (ICIP), 2011 18th IEEE International Conference on*. IEEE; 2011. p. 2525–2528.
25. Wang X, Kwong S, Zhang Y. Considering binocular spatial sensitivity in stereoscopic image quality assessment. In: *Visual Communications and Image Processing (VCIP), 2011 IEEE*. IEEE; 2011. p. 1–4.
26. Bensalma R, Larabi MC. A perceptual metric for stereoscopic image quality assessment based on the binocular energy. *Multidimensional Systems and Signal Processing*. 2013; 24(2):281–316. doi: [10.1007/s11045-012-0178-3](https://doi.org/10.1007/s11045-012-0178-3)
27. Shao F, Lin W, Gu S, Jiang G, Srikanthan T. Perceptual full-reference quality assessment of stereoscopic images by considering binocular visual characteristics. *Image Processing, IEEE Transactions on*. 2013; 22(5):1940–1953. doi: [10.1109/TIP.2013.2240003](https://doi.org/10.1109/TIP.2013.2240003)
28. Kingdom FA. Binocular Vision: The Eyes Add and Subtract. *Current Biology*. 2012; 22(1):R22–R24. doi: [10.1016/j.cub.2011.11.048](https://doi.org/10.1016/j.cub.2011.11.048) PMID: [22240475](https://pubmed.ncbi.nlm.nih.gov/22240475/)
29. Yun N, Feng Z, Yang J, Lei J. The objective quality assessment of stereo image. *Neurocomputing*. 2013; 120:121–129. doi: [10.1016/j.neucom.2012.06.059](https://doi.org/10.1016/j.neucom.2012.06.059)
30. Banks MS, Read JC, Allison RS, Watt SJ. Stereoscopia and the human visual system. *SMPTE motion imaging journal*. 2012; 121(4):24–43. doi: [10.5594/j18173](https://doi.org/10.5594/j18173) PMID: [23144596](https://pubmed.ncbi.nlm.nih.gov/23144596/)
31. Howard IP, Rogers BJ. *Binocular vision and stereopsis*. Oxford University Press; 1995.
32. Cohn T, Lasley D. Binocular vision: Two possible central interactions between signals from two eyes. *Science*. 1976; 192(4239):561–563. doi: [10.1126/science.1257791](https://doi.org/10.1126/science.1257791) PMID: [1257791](https://pubmed.ncbi.nlm.nih.gov/1257791/)
33. May KA, Zhaoping L, Hibbard PB. Perceived direction of motion determined by adaptation to static binocular images. *Current Biology*. 2012; 22(1):28–32. doi: [10.1016/j.cub.2011.11.025](https://doi.org/10.1016/j.cub.2011.11.025) PMID: [22177901](https://pubmed.ncbi.nlm.nih.gov/22177901/)
34. Yang J, Hou C, Zhou Y, Zhang Z, Guo J. Objective quality assessment method of stereo images. In: *3DTV Conference: The True Vision-Capture, Transmission and Display of 3D Video, 2009*. IEEE; 2009. p. 1–4.
35. Sizintsev M, Wildes RP. Spacetime Stereo and 3D Flow via Binocular Spatiotemporal Orientation Analysis. *Pattern Analysis and Machine Intelligence, IEEE Transactions on*. 2014; 36(11):2241–2254. doi: [10.1109/TPAMI.2014.2321373](https://doi.org/10.1109/TPAMI.2014.2321373)
36. Vimal P, Ram L. Orientation tuning of the spatial-frequency-tuned mechanisms of the Red–Green channel. *JOSA A*. 1997; 14(10):2622–2632. doi: [10.1364/JOSAA.14.002622](https://doi.org/10.1364/JOSAA.14.002622)
37. Li S, Zhang F, Ma L, Ngan KN. Image quality assessment by separately evaluating detail losses and additive impairments. *Multimedia, IEEE Transactions on*. 2011; 13(5):935–949. doi: [10.1109/TMM.2011.2152382](https://doi.org/10.1109/TMM.2011.2152382)
38. Watanabe A, Mori T, Nagata S, Hiwatashi K. Spatial sine-wave responses of the human visual system. *Vision Research*. 1968; 8(9):1245–1263. doi: [10.1016/0042-6989\(68\)90031-X](https://doi.org/10.1016/0042-6989(68)90031-X) PMID: [5682796](https://pubmed.ncbi.nlm.nih.gov/5682796/)
39. Zhang F, Li S, Ma L, Ngan KN. Limitation and challenges of image quality measurement. In: *Visual Communications and Image Processing 2010*. International Society for Optics and Photonics; 2010. p. 774402–774402.
40. Watson AB, Yang GY, Solomon J, Villasenor J, et al. Visibility of wavelet quantization noise. *Image Processing, IEEE Transactions on*. 1997; 6(8):1164–1175. doi: [10.1109/83.605413](https://doi.org/10.1109/83.605413)
41. Scharstein D, Szeliski R. A taxonomy and evaluation of dense two-frame stereo correspondence algorithms. *International journal of computer vision*. 2002; 47(1–3):7–42. doi: [10.1023/A:1014573219977](https://doi.org/10.1023/A:1014573219977)
42. Yang J, Liu Y, Meng Q, Chu R. Objective Evaluation Criteria for Stereo Camera Shooting Quality under Different Shooting Parameters and Shooting Distances. *IEEE SENSORS JOURNAL*. 2015; 15(8):4508–4521. doi: [10.1109/JSEN.2015.2421518](https://doi.org/10.1109/JSEN.2015.2421518)
